# Supplementary material for: The potential sunlight harvesting efficiency of carbon nanotube solar cells
Source: Royal Society of Chemistry journal article supplement (doi:10.1039/c3ee41731j), 2013-01-01
Supplement: c3ee41731j.pdf [file c3ee41731j.pdf]

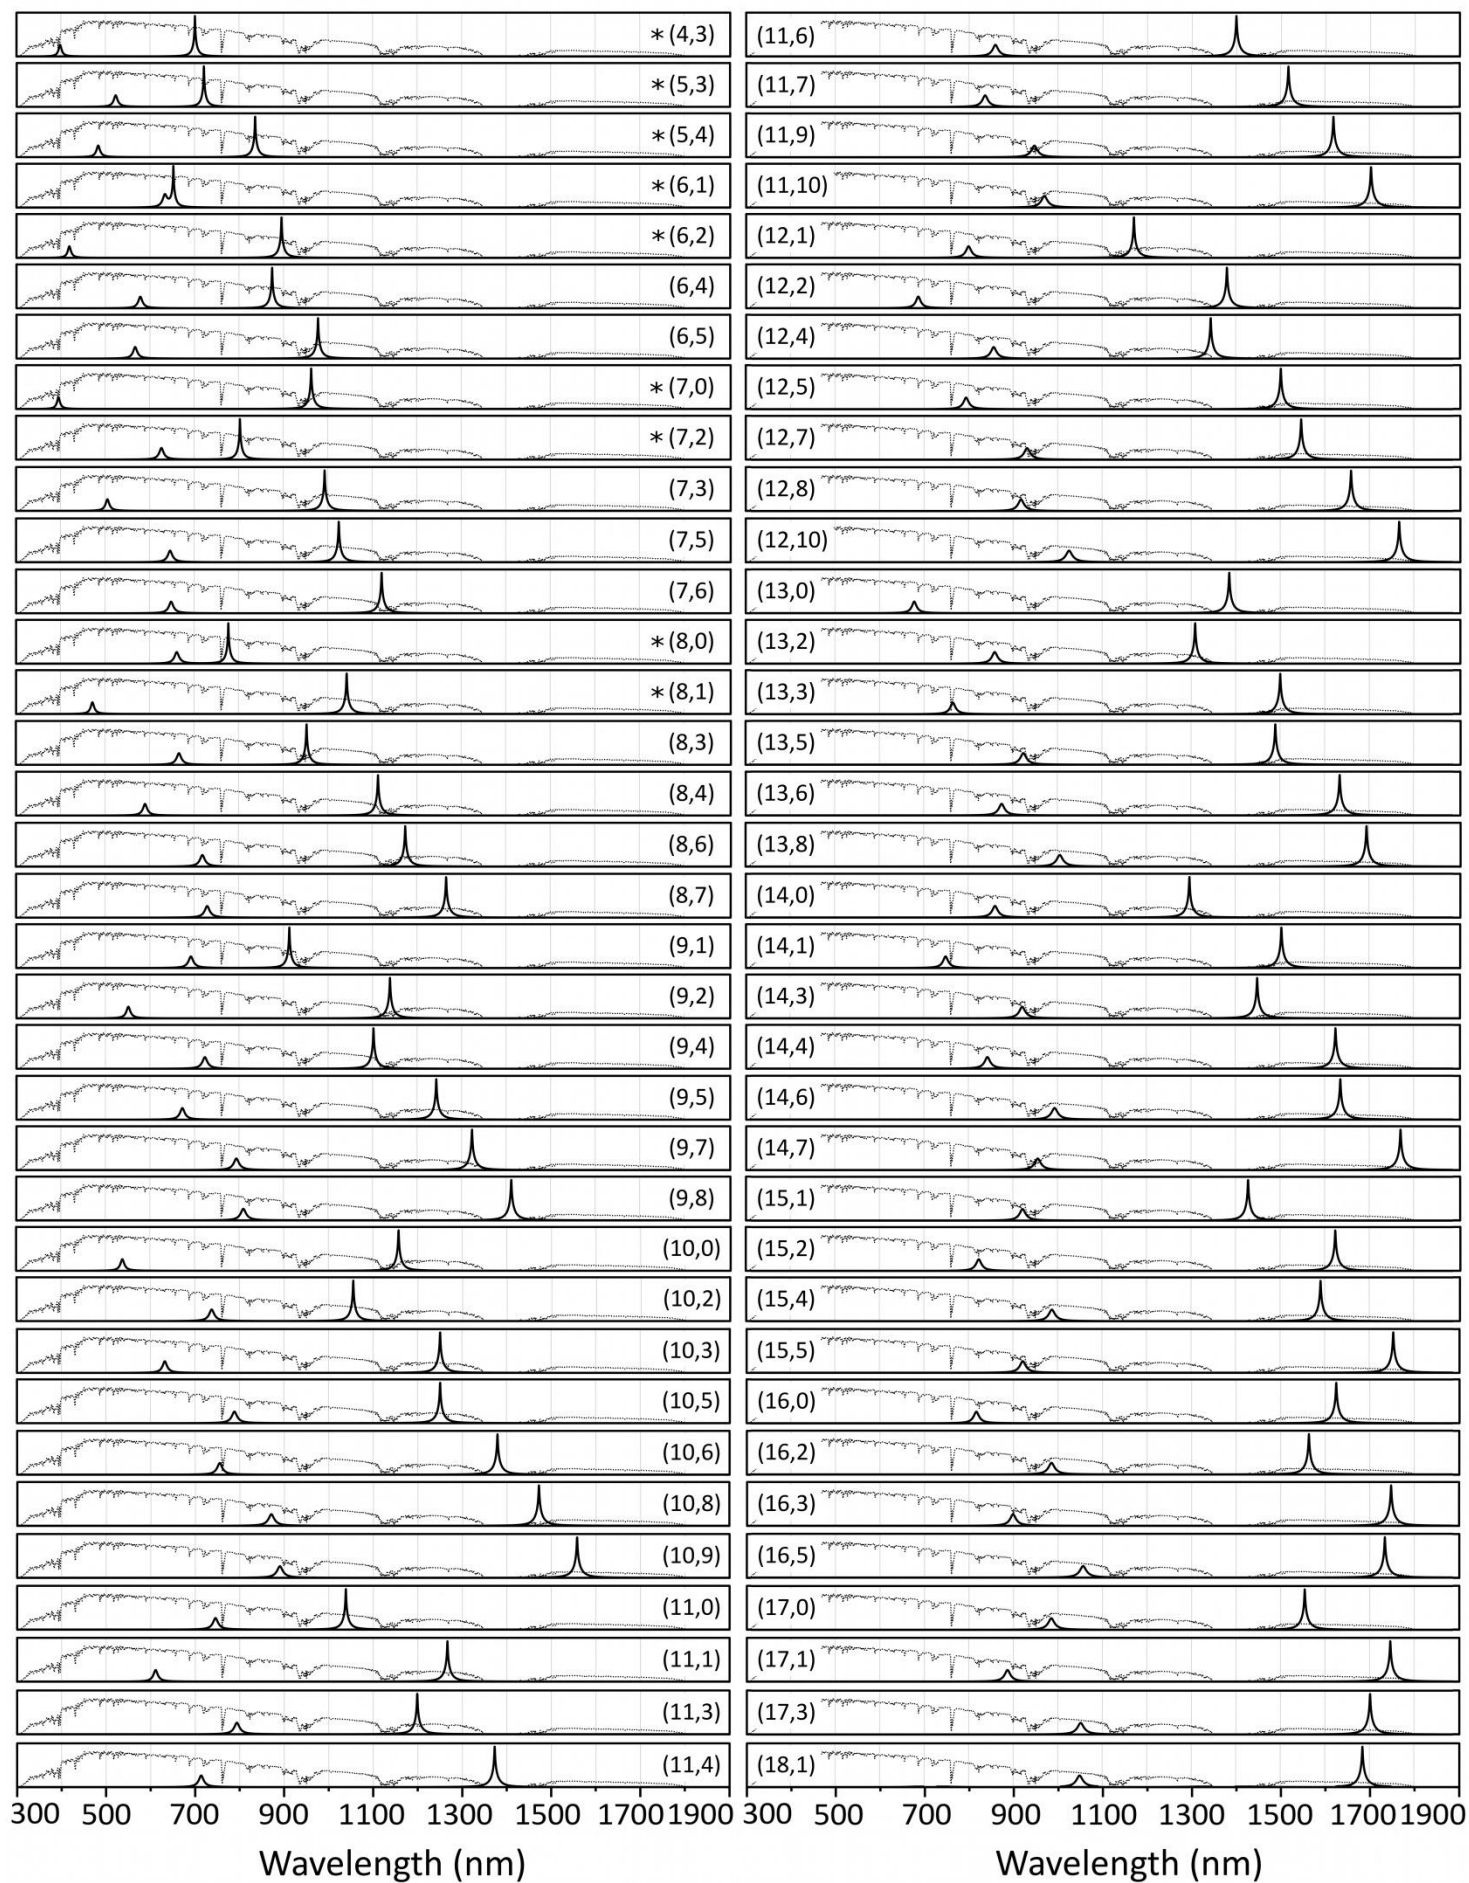

**Figure S1.** The simulated absorption spectra of all of the s-SWNTs considered, listed in order of (n,m) species and overlaid by the AM1.5G solar reference spectrum. Species marked with an asterisk (\*) have not been demonstrated to be stable in the isolated state (diameter less than ~0.7 nm) but are known to exist as the inner walls of double- or multi-walled nanotubes.
